# Supplementary material for: A contribution to the quantification of crustal shortening and kinematics of deformation across the Western Andes ( ∼ 20–22° S)
Source: Copernicus journal article supplement (doi:10.5194/se-14-17-2023), 2023-01-06
Supplement: Supplementary file 1 [file se-14-17-2023-supplement.zip]

Archive with 3 entries (3 files):
- Supp-Info_Habel-et-al-2022-V3.pdf
- se-14-17-2023-supplement-title-page.pdf
- field_Habel_etal__SE_2022.kmz
