# Supplementary material for: A contribution to the quantification of crustal shortening and kinematics of deformation across the Western Andes ( ∼ 20–22° S)
Source: Copernicus journal article supplement (doi:10.5194/se-14-17-2023), 2023-01-06
Supplement: Supplementary file 1 [file se-14-17-2023-supplement.zip › se-14-17-2023-supplement-title-page.pdf]

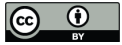

*Supplement of*

**A contribution to the quantification of crustal shortening and kinematics of deformation across the Western Andes ( $\sim 20\text{--}22^\circ\text{ S}$ )**

**Tania Habel et al.**

*Correspondence to:* Martine Simoes (simoes@ipgp.fr)

- se-14-17-2023-supplement-title-page.pdf
- Supp-Info\_Habel-et-al-2022-V3.pdf
- field\_Habel\_etal\_\_SE\_2022.kmz

The copyright of individual parts of the supplement might differ from the article licence.
